# Supplementary material for: Breath volatile metabolome reveals the impact of dietary fibres on the gut microbiota: Proof of concept in healthy volunteers
Source: PubMed Central journal article supplement — eBioMedicine. 2022 May 10;80:104051. doi: 10.1016/j.ebiom.2022.104051 (PMC9108873; doi:10.1016/j.ebiom.2022.104051), 2022-05-10
Supplement: mmc2.pdf [file mmc2.pdf]

**Breath volatile metabolome reveals the impact of dietary fibres on the gut  
microbiota: proof of concept in healthy volunteers**

Audrey M. Neyrinck, Julie Rodriguez, Zhengxiao Zhang, Julie-Anne Nazare, Laure B. Bindels,  
Patrice D. Cani, Véronique Maquet, Martine Lavoie, Stephan C. Bischoff, Jens Walter and Nathalie  
M. Delzenne

**Supplementary Materials**

**Table S1.** Baseline characteristics of participants <sup>1</sup>

|                          |              |
|--------------------------|--------------|
| Women/men N (%)          | 8/7 (53/47)  |
| Age (years old)          | 21 ± 2       |
| Body weight (kg)         | 67.3 ± 10.5  |
| BMI (kg/m <sup>2</sup> ) | 22.3 ± 2.0   |
| SBP, mm Hg               | 123.1 ± 11.3 |
| DBP, mm Hg               | 76.9 ± 6.1   |

<sup>1</sup>Values are means ± SD. BMI, body mass index; DBP, diastolic blood pressure; SBP, systolic blood pressure

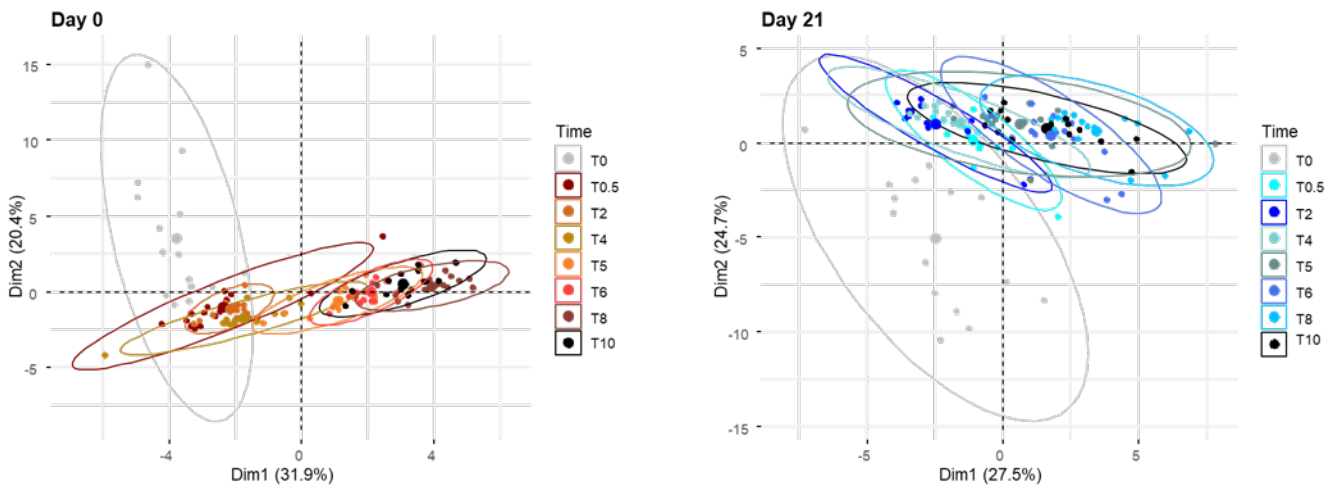

**Figure S1.** Untargeted analysis of breath from 15 healthy subjects prior (day 0) and after (day 21) chitin-glucan intake during 3 weeks. Principal component analysis (PCA) score plots obtained from the MS-fragment spectra ( $\text{H}_3\text{O}^+$ ,  $\text{NO}^+$  and  $\text{O}_2^+$  ionizations using SIFT-MS) at different times after the breakfast rich in dietary fibre.

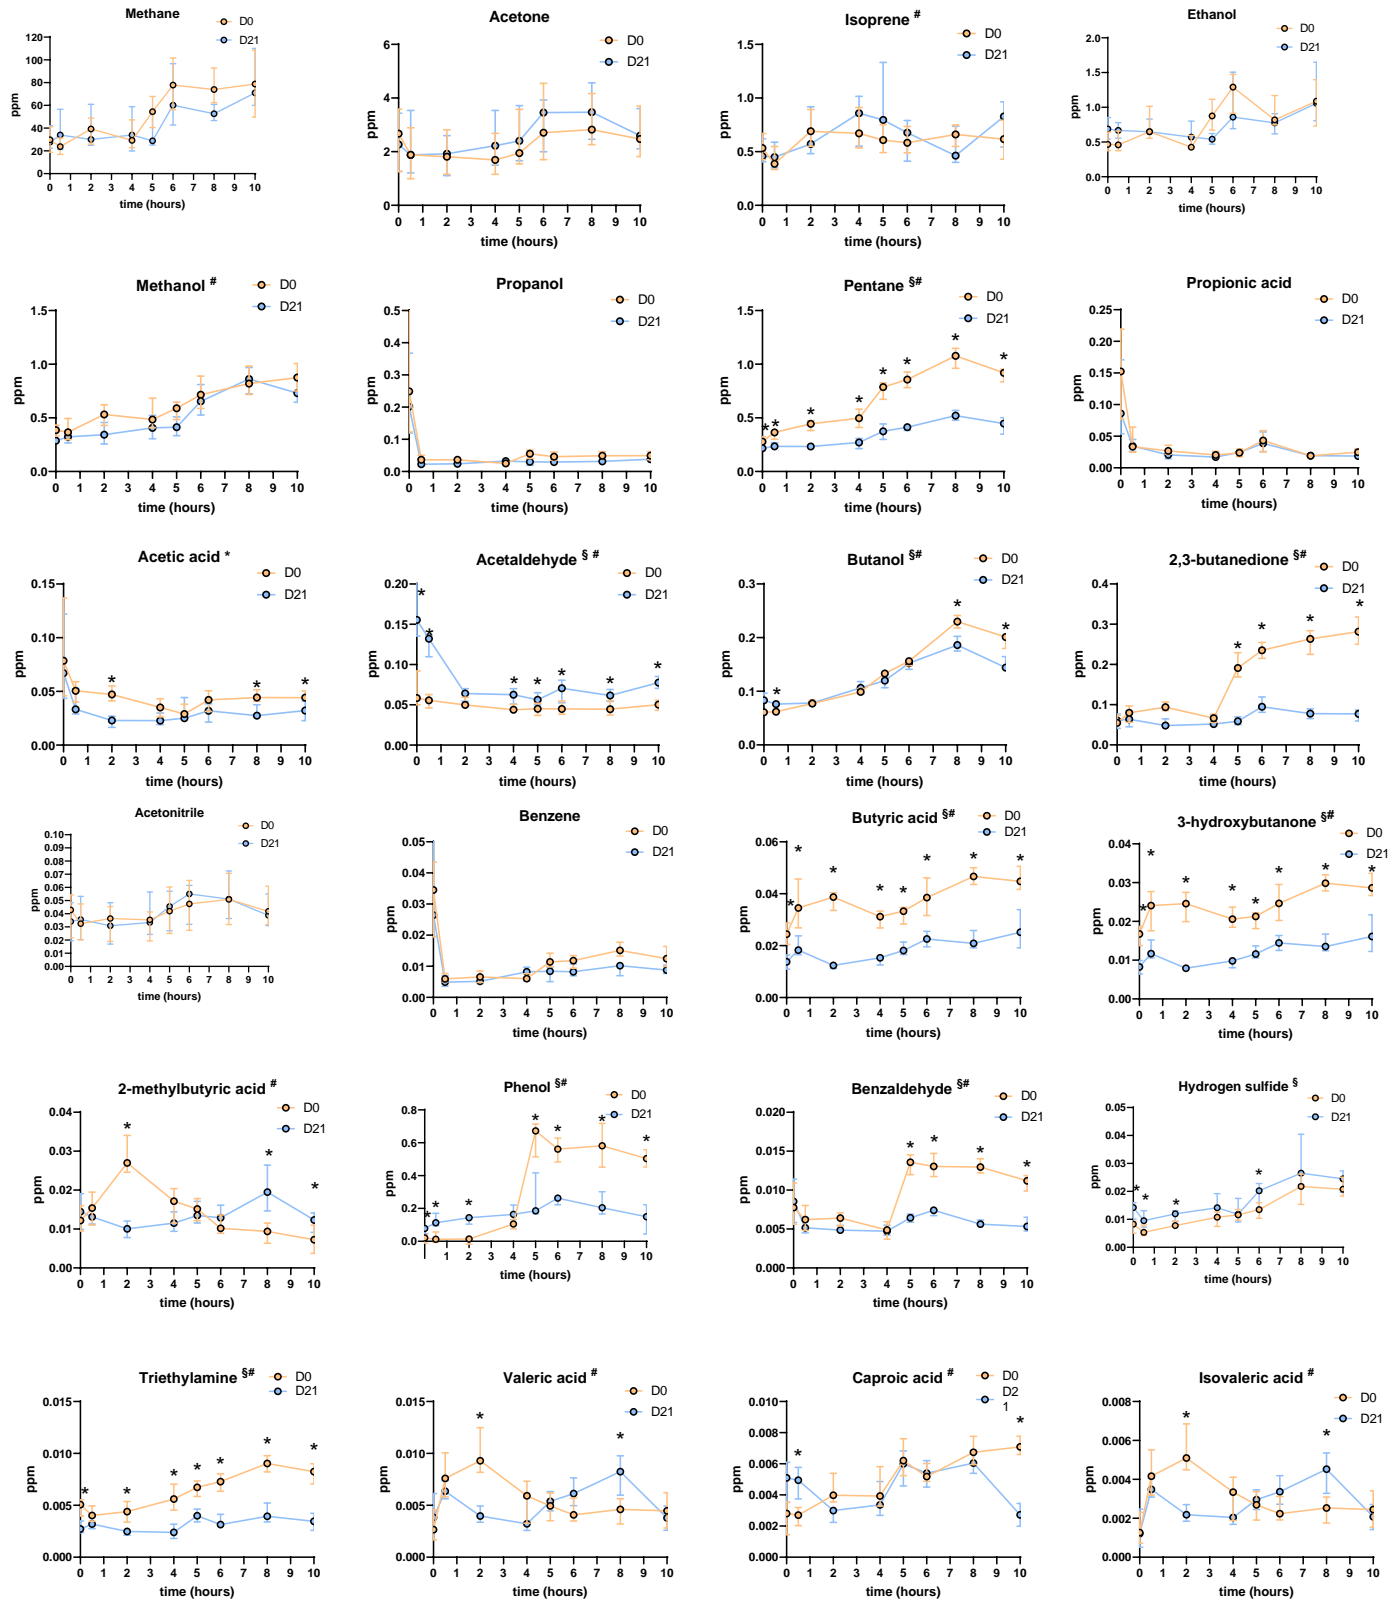

**Figure S2.** Targeted BVM concentrations presented in absolute values (ppm) exhaled in the breath of healthy subjects (n=15) prior (day 0) and after (day 21) chitin-glucan intake. Data are medians  $\pm$  interquartile ranges (mixed model: §significant effect of treatment, #significant interaction between treatment and time, \*Šídák post test: p<0.05).

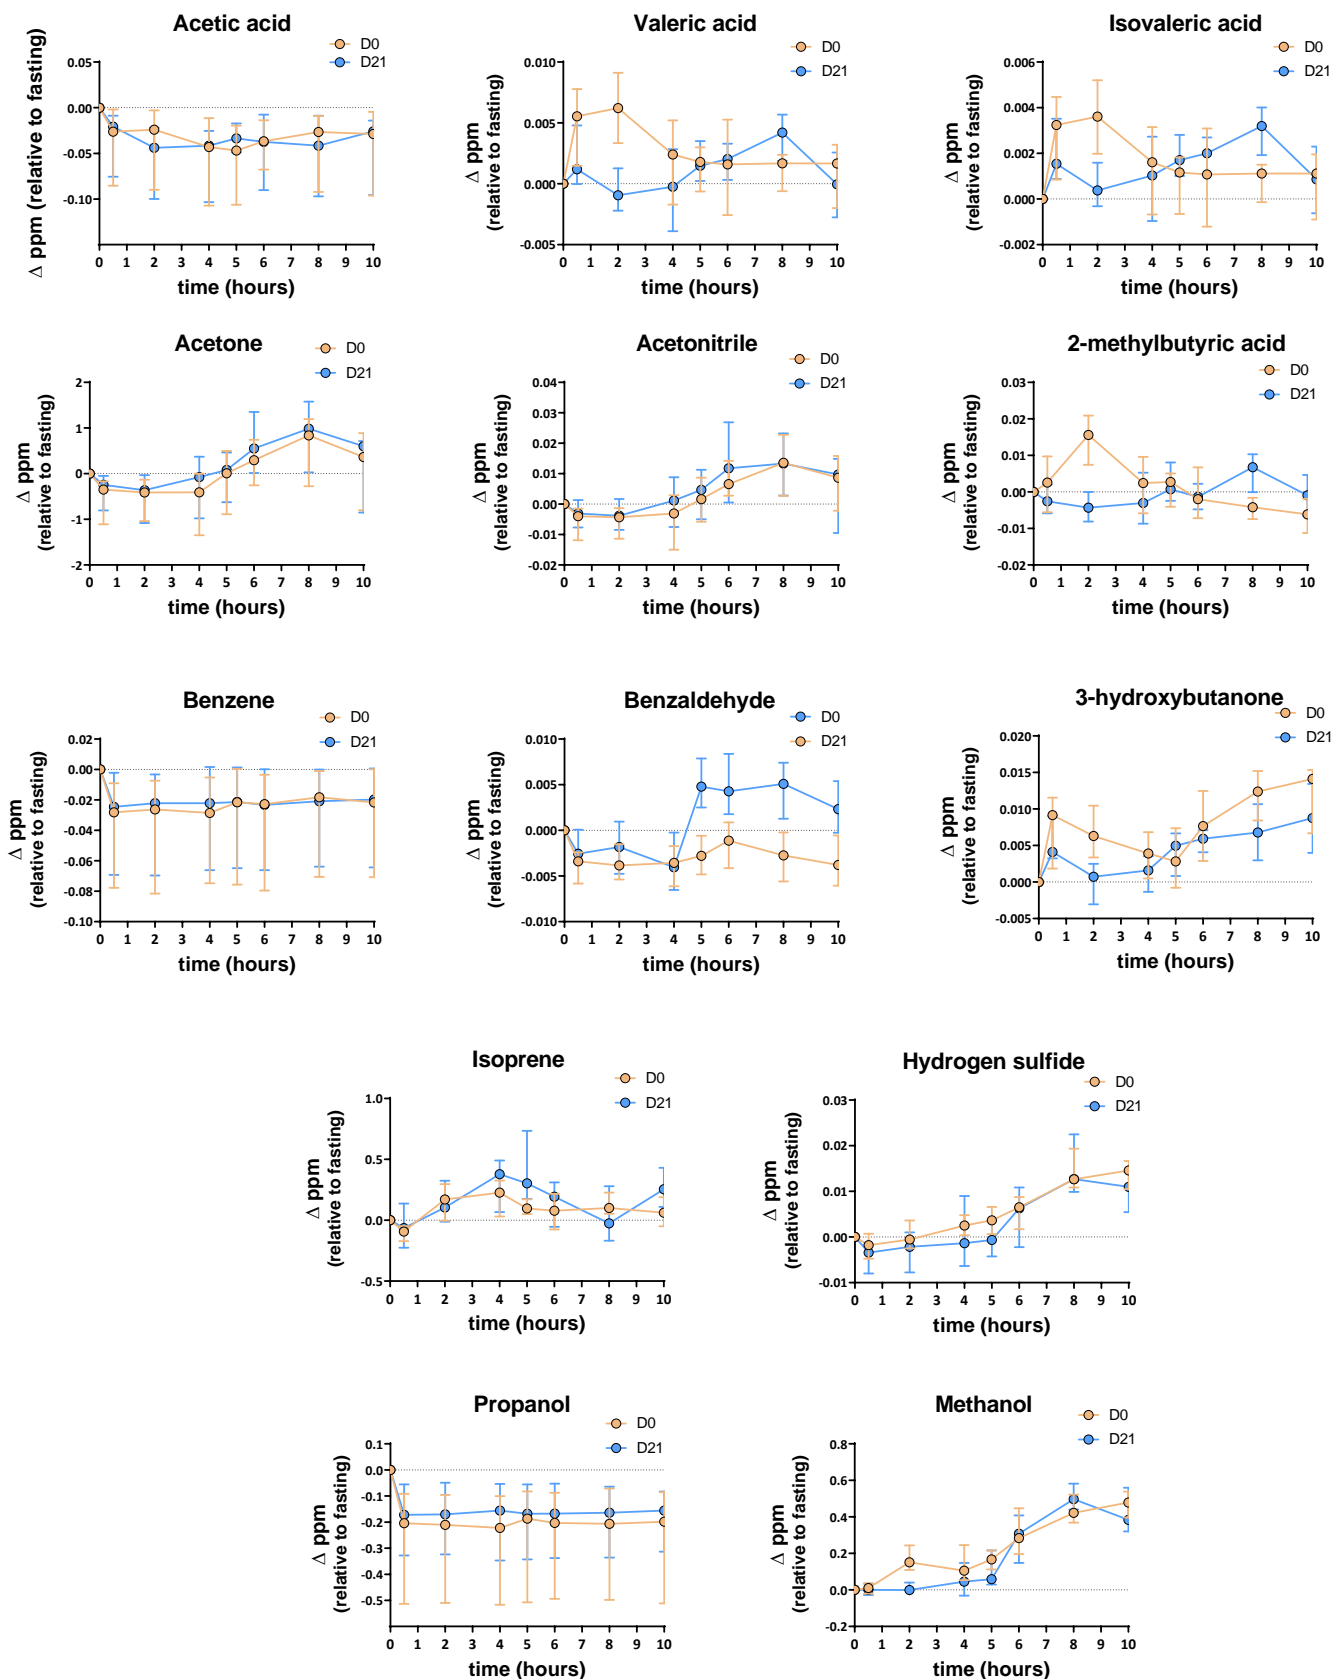

**Figure S3.** Targeted BVM concentrations (changes from baseline) exhaled in breath of healthy subjects ( $n=15$ ) in response to a standardized breakfast intake prior (day 0) and after (day 21) chitin-glucan intake (and not significantly affected by the chitin-glucan intake during 3 weeks). Data are medians  $\pm$  interquartile ranges ( $p>0.05$ ; matched-pairs Wilcoxon signed-rank test on net area under the curve).

**Table S2.** Power calculation and effect size on targeted BVM significantly affected by the chitin-glucan treatment<sup>1</sup>

|                          | <b>D0</b> | <b>D21</b> | <b>D21-D0</b> | <b>Power</b> | <b>Cohen's d</b> |
|--------------------------|-----------|------------|---------------|--------------|------------------|
| <b>Butyric acid</b>      |           |            |               |              |                  |
| Mean                     | 0,078     | 0,041      | -0,036        | 62%          | 0,63             |
| SD                       | 0,042     | 0,032      | 0,057         |              |                  |
| <b>Butanol</b>           |           |            |               |              |                  |
| Mean                     | 0,421     | 0,256      | -0,165        | 90%          | 0,91             |
| SD                       | 0,128     | 0,119      | 0,182         |              |                  |
| <b>Caproic acid</b>      |           |            |               |              |                  |
| Mean                     | 0,016     | -0,004     | -0,020        | 85%          | 0,83             |
| SD                       | 0,010     | 0,019      | 0,024         |              |                  |
| <b>Ethanol</b>           |           |            |               |              |                  |
| Mean                     | 2,059     | 0,390      | -1,669        | 90%          | 0,89             |
| SD                       | 2,134     | 1,721      | 1,864         |              |                  |
| <b>Methane</b>           |           |            |               |              |                  |
| Mean                     | 163,700   | 96,260     | -67,420       | 77%          | 0,75             |
| SD                       | 77,950    | 60,550     | 89,820        |              |                  |
| <b>Pentane</b>           |           |            |               |              |                  |
| Mean                     | 2,451     | 0,969      | -1,482        | 100%         | 2,07             |
| SD                       | 0,459     | 0,428      | 0,715         |              |                  |
| <b>Phenol</b>            |           |            |               |              |                  |
| Mean                     | 2,151     | 0,806      | -1,345        | 100%         | 3,20             |
| SD                       | 0,361     | 0,319      | 0,421         |              |                  |
| <b>Triethylamine</b>     |           |            |               |              |                  |
| Mean                     | 0,009     | 0,004      | -0,005        | 62%          | 0,66             |
| SD                       | 0,007     | 0,005      | 0,008         |              |                  |
| <b>3-hydroxubutanone</b> |           |            |               |              |                  |
| Mean                     | 0,048     | 0,030      | -0,018        | 41%          | 0,48             |
| SD                       | 0,028     | 0,021      | 0,037         |              |                  |
| <b>2,3 butanedione</b>   |           |            |               |              |                  |
| Mean                     | 0,682     | 0,007      | -0,675        | 100%         | 3,82             |
| SD                       | 0,146     | 0,182      | 0,177         |              |                  |

<sup>1</sup>Power computation was carried out on net AUC of BVM using the PASS 14.0.7 software with a significance level of 0,05 (Wilcoxon test) taking into account the difference (change after 21 days from day 0), the standard deviation (SD) and the sample size (n=15). Effect size was calculated with Cohen's d i.e. by dividing the mean difference by the SD of the difference (Cohen, 1998. *Statistical Power Analysis for the Behavioral Sciences*. 2nd ed. Hillsdale, NJ: Lawrence Erlbaum Associates).

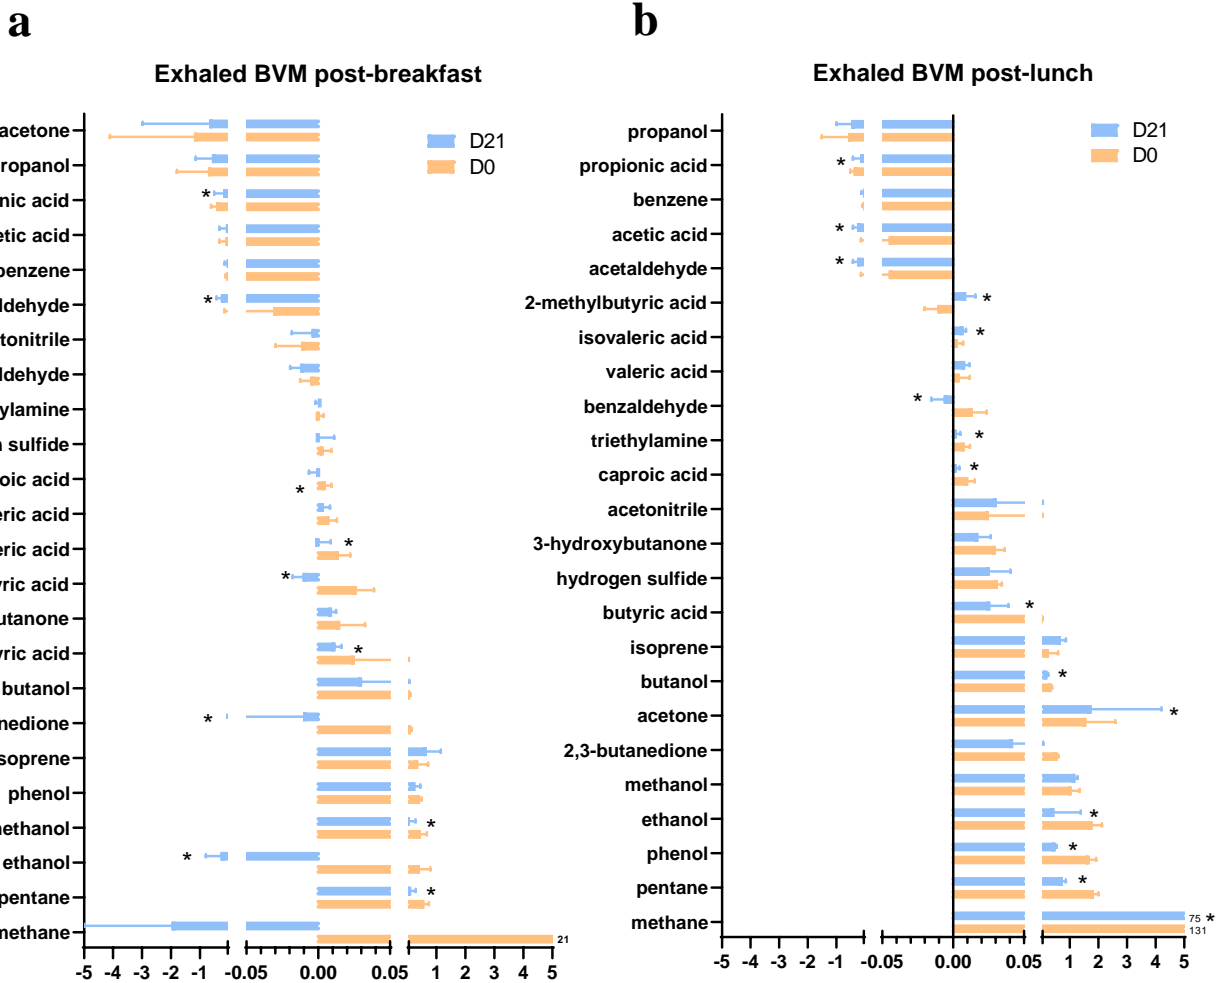

**Figure S4.** Net area under the curves of targeted BVM concentrations exhaled in breath after the breakfast intake (a) and after the lunch intake (b) of healthy subjects (n=15) prior (day 0) and after (day 21) chitin-glucan. Data are medians  $\pm$  interquartile ranges (\* $p < 0.05$ ; matched-pairs Wilcoxon signed-rank test on net area under the curve).

**Table S3.** Baseline score of gastrointestinal symptoms of the participants at fasting state<sup>1</sup>

|            | <b>Day 0</b> |           | <b>Day 21</b> |          |
|------------|--------------|-----------|---------------|----------|
| Nausea     | 0.3 ± 1.0    | (0[0-0])  | 0.0 ± 0.0     | (0[0-0]) |
| Flatulence | 2.7 ± 5.2    | (0[0-3])  | 2.5 ± 5.4     | (0[0-1]) |
| Bloating   | 2.6 ± 4.9    | (0[0-6])  | 4.1 ± 6.6     | (0[0-9]) |
| Cramp      | 1.5 ± 4.2    | (0[0-0])  | 0.0 ± 0.0     | (0[0-0]) |
| Rumbling   | 6.3 ± 13.4   | (0[0-14]) | 2.9 ± 7.9     | (0[0-0]) |
| Reflux     | 0.2 ± 0.8    | (0[0-0])  | 0.1 ± 0.5     | (0[0-0]) |
| Discomfort | 2.4 ± 4.7    | (0[0-2])  | 2.1 ± 3.7     | (0[0-4]) |
| Burp       | 0.6 ± 1.8    | (0[0-0])  | 0.1 ± 0.5     | (0[0-0]) |

<sup>1</sup>Values are means ± SD (medians [interquartile ranges]) (n=15, p > 0.05, matched-pairs Wilcoxon signed-rank test).



**a**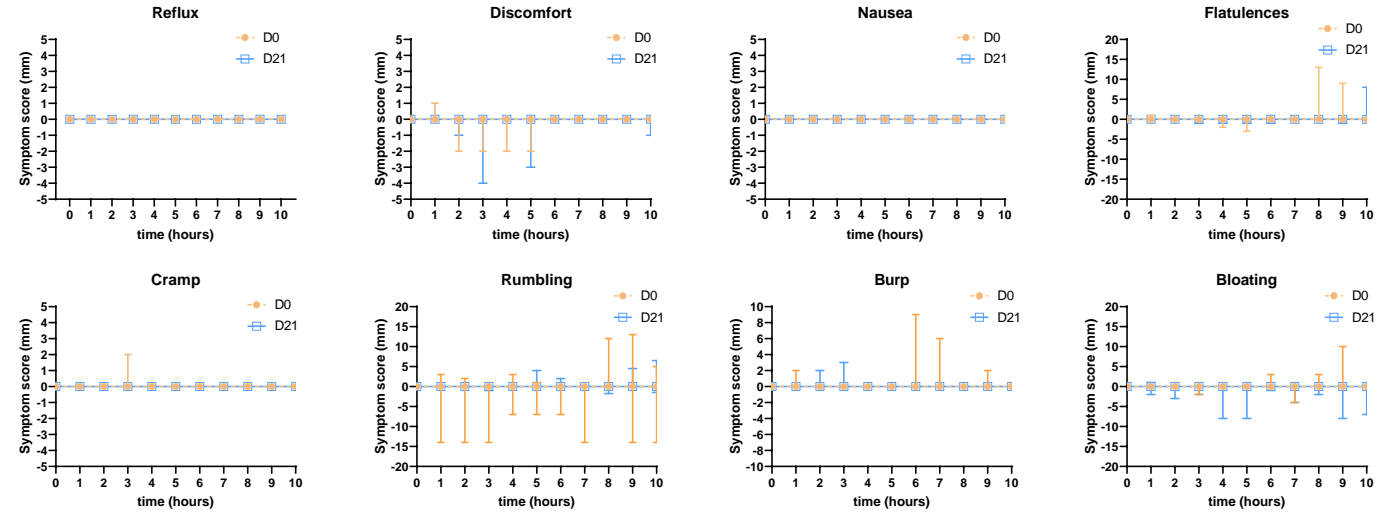**b**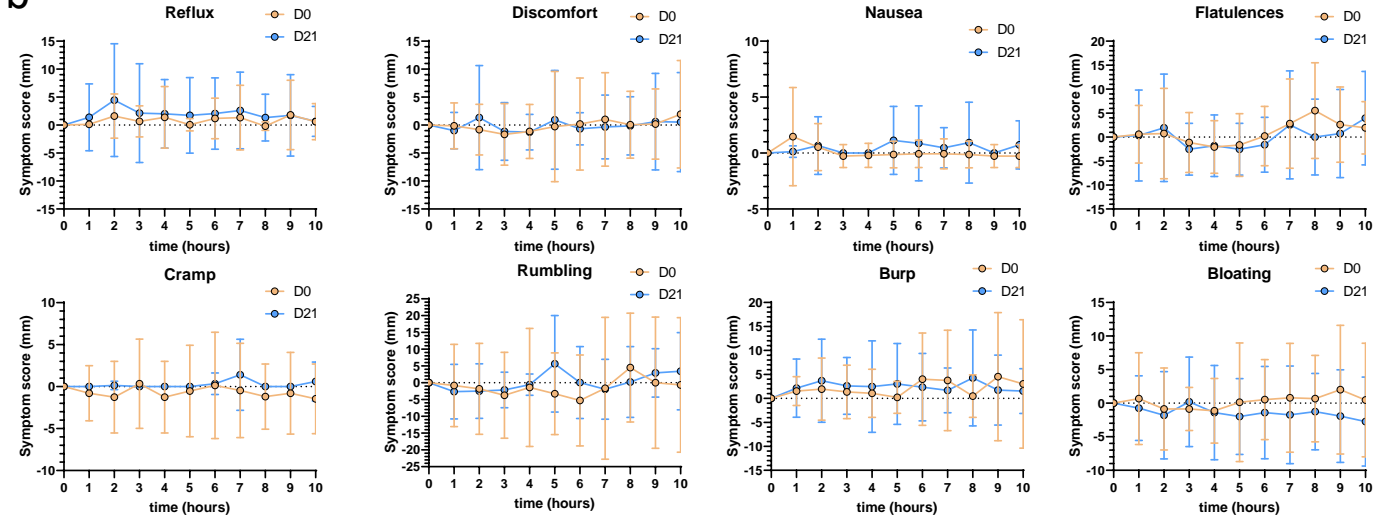

**Figure S5.** Gastrointestinal tolerance of healthy subjects ( $n=15$ ) about 8 symptoms assessed by visual analog scale (changes from baseline) in response to a standardized breakfast intake prior (day 0) and after (day 21) chitin-glucan intake during 3 weeks. Data are medians  $\pm$  interquartile ranges (a). Data are means  $\pm$  SD (b);  $p > 0.05$ ; matched-pairs Wilcoxon signed-rank test on net AUC.
